# Supplementary material for: Social Determinants of Smoking in Low- and Middle-Income Countries: Results from the World Health Survey
Source: PLoS One. 2011 May 31;6(5):e20331. doi: 10.1371/journal.pone.0020331 (PMC3105024; doi:10.1371/journal.pone.0020331)
Supplement: List S1 — List of in-country collaborating partners. (XLS) [file pone.0020331.s004.xls]

## Sheet: Collaborating partners
Country	WHO Region	Country focal point
Bangladesh	SEAR	Mitra and Associates
Bosnia and Herzegovina	EUR	The Federal Public Health Institute
Brazil	AMR	Fundacao Oswaldo Cruz
Burkina Faso	AFR	Institut de Recherche en Sciences de la Santé
Chad	AFR	Faculté des Sciences de la Santé, Univ N'Djamena
China	WPR	Centre for Health Statistics Information
Comoros	AFR	Bureau Comorien de Conseil
Congo	AFR	Unité de recherche sur les systèmes de santé
Cote d'Ivoire	AFR	Ministère de la Santé
Croatia	EUR	The Croatian National Institute of Public Health
Czech Republic	EUR	Institute of Health Information and Statistics
Dominican Republic	AMR	Centro de Estudios Sociales y Demográficos (CESDEM)
Ecuador	AMR	Fundación Ecuatoriana para la Salud y el Desarroll (FESALUD)
Estonia	EUR	Saar Poll Ltd.
Ethiopia	AFR	Department of Community Health, Jimma University
Georgia	EUR	Georgian State Medical Academy (GSMA)
Ghana	AFR	Department of Community Health, Ghana Medical Sch
Hungary	EUR	Johan Bela National Centre for Epidemiology
India	SEAR	International Institute of Population Sciences
Kazakhstan	EUR	Kazakstan School of Public Health (KSPH)
Kenya	AFR	Central Bureau of Statistics
Lao People's Democratic Republic	WPR	National Institute of Public Health, Ministry of Health
Latvia	EUR	The Health Promotion Center
Malawi	AFR	Centre for Social Research (CSR)
Malaysia	WPR	Public Health Institute, Ministry of Health
Mali	AFR	Cellule de Planification et de Statistique, (CPS)
Mauritania	AFR	Office Nationale de la Statistique (ONS)
Mauritius	AFR	Mauritius Instituteof Health
Mexico	AMR	Instituto Nacional de Salud Pública
Morocco	EMR	Ministère de la Santé
Myanmar	SEAR	Department of Medical Research, Ministry of Health
Namibia	AFR	Ministry of Health
Nepal	SEAR	ORG-MARG Nepal PVT.Ltd
Pakistan	EMR	Ministry of Health
Paraguay	AMR	Fac.de Ciencias Veterinarias, Univ. Nacional/DGEEC
Philippines	WPR	College of Medicine, University of the Philippines
Russian Federation	EUR	Semashko Institute for Research on Social Hygiene,
Senegal	AFR	Direction Etudes, Recherche et Formation (DERF)
Slovakia	EUR	Environment,s.c., Centre of Biostatistics and Envi
South Africa	AFR	Community Agency for Social Enquiry (CASE)
Sri Lanka	SEAR	Ministry of Health
Swaziland	AFR	Faculty of Health Sciences, Univ Swaziland
Tunisia	EMR	Institut National de la Santé Publique
Ukraine	EUR	Odessa State Medical University
Uruguay	AMR	Centro de Estudios de Economia y Salud (CEES)
Viet Nam	WPR	Ministry of Health
Zambia	AFR	School of Humanities & Social Sciences, University of Zambi
Zimbabwe	AFR	Community Health, University of Zimbabwe
